# Supplementary material for: Blackcurrant (Ribes nigrum L.) Extract Exerts Potential Vasculoprotective Effects in Ovariectomized Rats, Including Prevention of Elastin Degradation and Pathological Vascular Remodeling
Source: PubMed Central journal article supplement (PMC7915542; doi:10.3390/nu13020560), 2021-02-08
Supplement: nutrients-13-00560-s001.pdf [file nutrients-13-00560-s001.pdf]

## Supplementary Files

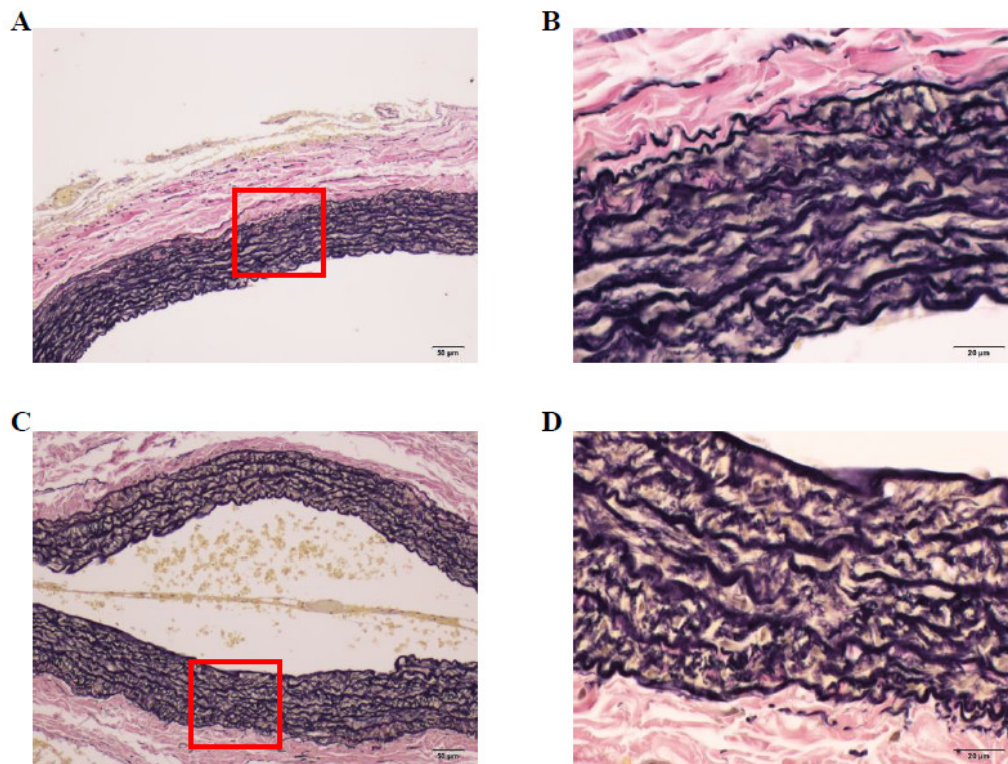

**Supplementary Figure S1.** Representative images of structurally normal vessels at Elasticavan Giesonstain in Sham (A) and BCE (C) rats, lower magnification ( $\times 100$ , scale bar = 50  $\mu\text{m}$ ). (B,D) were higher magnification boxed area shown in panel A and C (magnification  $\times 400$ , scale bar = 20  $\mu\text{m}$ ).

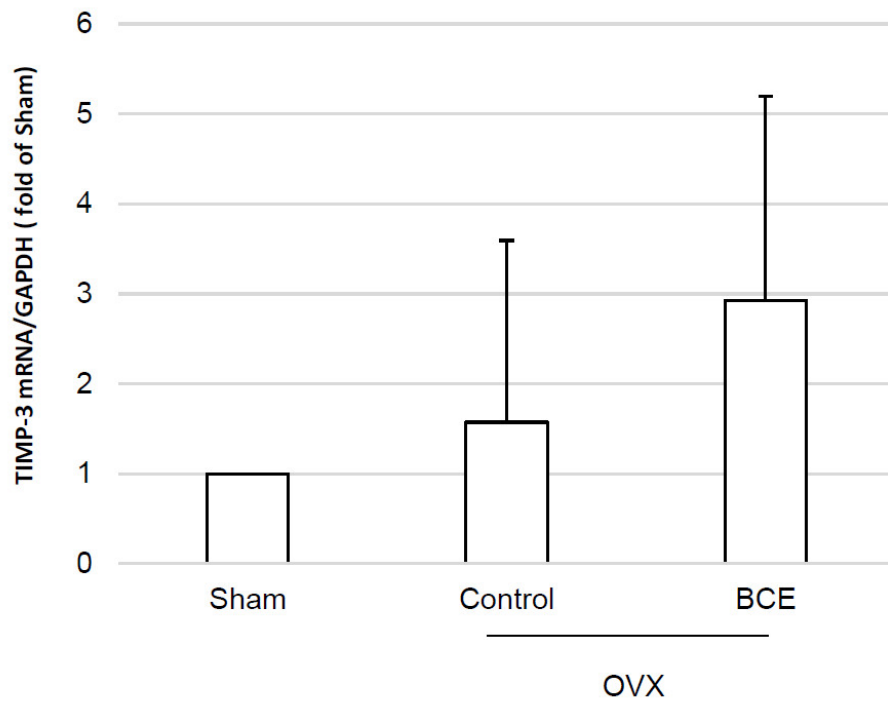

**Supplementary Figure S2.** TIMP3 mRNA expression in BCE-treated OVX rats quantified by RT-qPCR. Data are shown as the mean  $\pm$  standard error of the mean of at least three independent experiments. .
